# Supplementary material
Source: PubMed Central journal article supplement (PMC4510843)
Supplement: supp_jeb.121947_JEB121947supp.pdf [file supp_jeb.121947_JEB121947supp.pdf]

**Supplementary Table 1** Measures of oxidative status in relation to factors examined among male and female rhesus macaques on Cayo Santiago.

| Variable                                 | 8-OHdG (ng/ml)                                      | TBARS (MDA nmol/mL)              | TAC (Trolox mM)                  |
|------------------------------------------|-----------------------------------------------------|----------------------------------|----------------------------------|
| Male rank (mating season, MS)            | $\tau = 0.20, N = 11, P = 0.45$                     | $\tau = -0.13, N = 13, P = 0.58$ | $\tau = -0.14, N = 14, P = 0.51$ |
| Male rank (post alpha overthrow, PAO)    | $\tau = -0.13, N = 11, P = 0.64$                    | $\tau = -0.28, N = 13, P = 0.20$ | $\tau = -0.21, N = 14, P = 0.32$ |
| Female rank (high vs. low)               | $W = 35, N = 17, P = 0.96$                          | $W = 37, N = 17, P = 0.96$       | $W = 42, N = 17, P = 0.61$       |
| Offspring age (days)                     | $\tau = 0.26, N = 17, P = 0.16$                     | $\tau = 0.01, N = 17, P = 1.0$   | $\tau = 0.30, N = 17, P = 0.10$  |
| Offspring sex (multiparous females only) | <b><math>W = 53, N = 16, P = 0.02^*</math></b>      | $W = 22, N = 16, P = 0.35$       | $W = 33, N = 16, P = 0.92$       |
| Male copulation rate (MS)                | $\tau = -0.40, N = 11, P = 0.10$                    | $\tau = 0.09, N = 13, P = 0.71$  | $\tau = -0.04, N = 14, P = 0.87$ |
| Male rate of dominance events (MS)       | $\tau = -0.05, N = 11, P = 0.88$                    | $\tau = 0.18, N = 13, P = 0.43$  | $\tau = 0.10, N = 14, P = 0.66$  |
| Male attack rate (MS)                    | $\tau = -0.05, N = 11, P = 0.88$                    | $\tau = -0.22, N = 13, P = 0.33$ | $\tau = 0.35, N = 14, P = 0.09$  |
| Male rate of dominance events (PAO)      | $\tau = 0.26, N = 11, P = 0.31$                     | $\tau = 0.22, N = 13, P = 0.33$  | $\tau = 0.11, N = 14, P = 0.62$  |
| Male attack rate (PAO)                   | <b><math>\tau = 0.50, N = 11, P = 0.04^*</math></b> | $\tau = 0.00, N = 13, P = 1.0$   | $\tau = -0.14, N = 14, P = 0.51$ |

## Supplementary figures

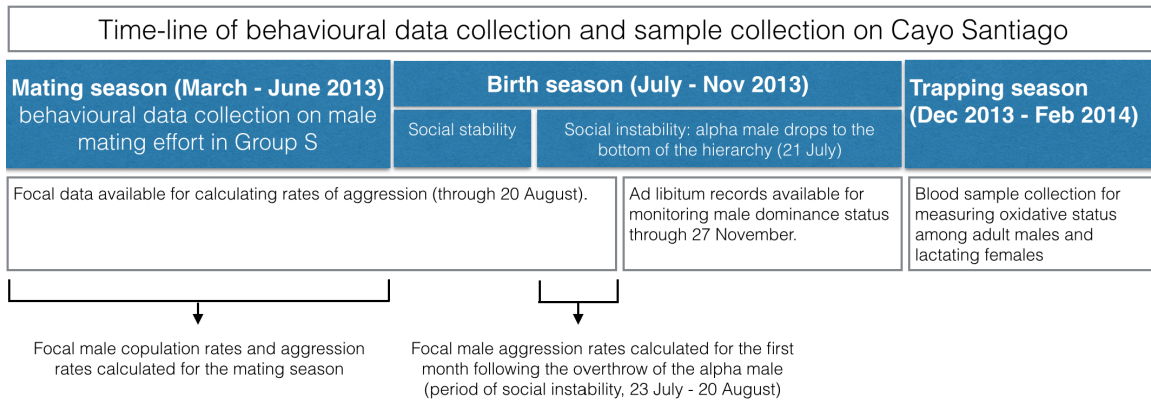

### Figure S1

Schematic time-line of the study depicting when behavioural variables were measured in relation to measurements of oxidative status.

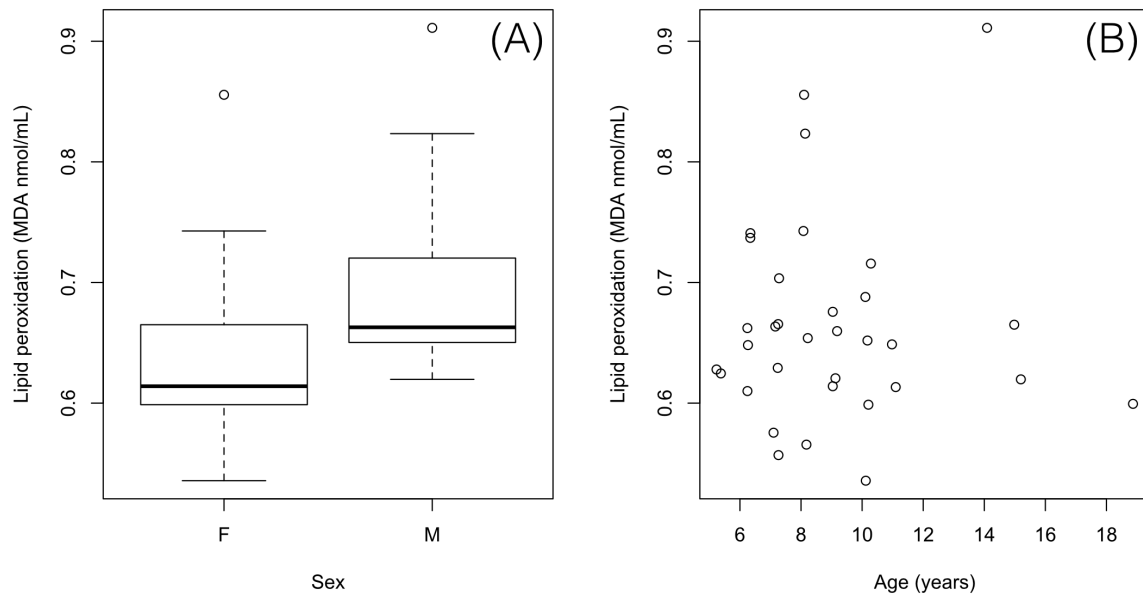

**Figure S2**

Lipid peroxidation was higher among males than among females (A) but was not related to age (B).

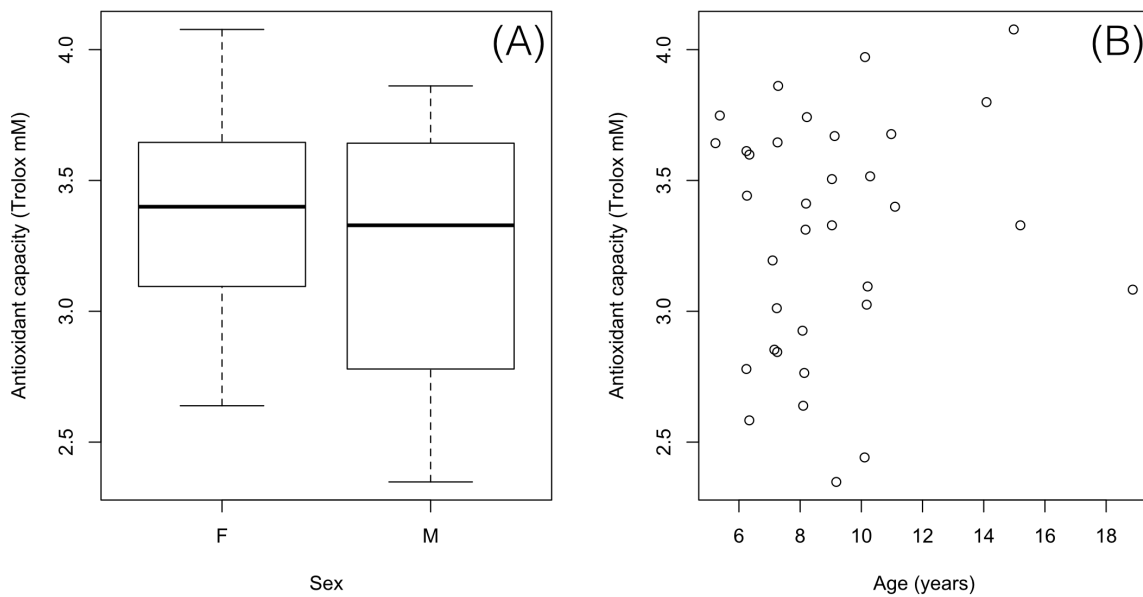

**Figure S3**

Total antioxidant capacity of plasma samples was not related to individual's sex (A) or age (B).

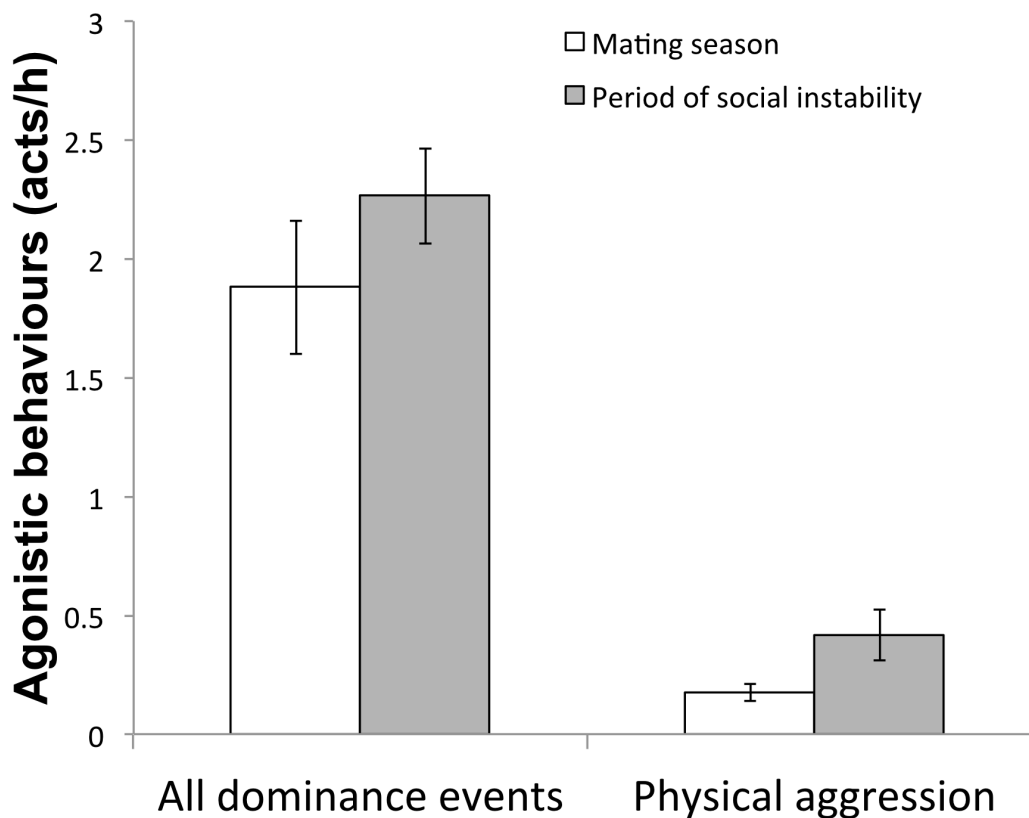

**Figure S4**

Male agonistic effort during the mating season (March – June 2013) and during the period of social instability that followed the overthrow of the alpha male (23 July – 20 August 2013). The bar-plot shows mean values (N=11 males) with standard errors.
